# Supplementary material for: Assimilation and Accommodation
Source: Atypon-hosted journal article supplement (doi:10.1027/1016-9040/a000463), 2021-11-27
Supplement: 1016-9040_a000463_esm1.pdf [file 1016-9040_a000463_esm1.pdf]

**ESM 1**

*Frequencies: Categories and subcategories*

| Category                      | Subcategory                                             | <i>n</i> |
|-------------------------------|---------------------------------------------------------|----------|
| Social Context                | Synonym for acculturation to new social system          | 37       |
|                               | Phase in acculturation to new social system             | 34       |
|                               | Synonym for adjustment in general                       | 22       |
|                               | Piaget                                                  | 4        |
|                               | Social identity formation                               | 4        |
|                               | No subcategory                                          | 3        |
|                               |                                                         | 104      |
| Personality and Identity      | Identity (intentional development)                      | 28       |
|                               | Personality                                             | 17       |
|                               | World view / beliefs / ego                              | 12       |
|                               | Meaning making                                          | 9        |
|                               | Personality growth and development                      | 7        |
|                               |                                                         | 73       |
| Clinical Context              | Piaget's conceptualization                              | 11       |
|                               | Approach by Joseph and Linley                           | 10       |
|                               | Approach by Resick and Schnicke                         | 9        |
|                               | Trauma (general)                                        | 7        |
|                               | Approach by Stiles and Webb                             | 7        |
|                               | Therapist (counselor) education                         | 6        |
|                               | No subcategory                                          | 5        |
|                               | Approach by Horowitz                                    | 2        |
|                               | Clinical context                                        | 1        |
| Approach by Hollon and Garber | 1                                                       |          |
|                               |                                                         | 59       |
| Coping                        | Coping approach by Brandtstädter                        | 38       |
|                               | Coping after trauma                                     | 7        |
|                               | Dreaming as coping                                      | 3        |
|                               | No subcategory                                          | 2        |
|                               | Coping with stress                                      | 2        |
|                               |                                                         | 52       |
| Epistemological Issues        | Integration of different psychotherapeutical approaches | 28       |
|                               | Epistemological context                                 | 9        |
|                               | Clinical context                                        | 5        |
|                               | Cultural                                                | 5        |
|                               | Constructivism                                          | 3        |
|                               | No subcategory                                          | 2        |
|                               |                                                         | 52       |
| Educational Context           | Teaching and learning                                   | 23       |
|                               | Cognitive development (general)                         | 12       |
|                               | No subcategory                                          | 7        |
|                               | Significant ideas of 20th century                       | 5        |
|                               | Wiki-supported learning                                 | 4        |

|                                                        |                                      |     |
|--------------------------------------------------------|--------------------------------------|-----|
|                                                        |                                      | 51  |
| Psycholinguistic Approaches                            | Approach by Perfetti and Liu         | 12  |
|                                                        | Psycholinguistics                    | 9   |
|                                                        | Piaget                               | 2   |
|                                                        | No subcategory                       | 1   |
|                                                        |                                      | 24  |
| Biological and Neurophysiological Perspectives         | Memory                               | 9   |
|                                                        | Approach by Fiedler                  | 9   |
|                                                        | Perception                           | 4   |
|                                                        | No subcategory                       | 1   |
|                                                        | Genetic context                      | 1   |
|                                                        |                                      | 24  |
| Behavioral Context                                     | Robotic approach                     | 4   |
|                                                        | Behavioral / dance                   | 3   |
|                                                        | Martial arts                         | 1   |
|                                                        |                                      | 8   |
| Assimilation and Accommodation Used in Another Meaning | No subcategory                       | 5   |
|                                                        | Cognitive model or schema enrichment | 5   |
|                                                        | Synonym for adjustment in general    | 2   |
|                                                        | Piaget                               | 2   |
|                                                        |                                      | 14  |
| No Explicit Use of Assimilation and Accommodation      | No subcategory                       | 12  |
|                                                        |                                      | 473 |
